# Supplementary material for: Participation in Training for Depression Care Quality Improvement: A Randomized Trial of Community Engagement or Technical Support
Source: Atypon-hosted journal article supplement (doi:10.1176/appi.ps.201400099), 2015-05-01
Supplement: appi.ps.201400099.ds001.pdf [file appi.ps.201400099.ds001.pdf]

CPIC Training Participation Appendices

Appendix Figure 1: CONSORT Design of recruitment, enrollment of agencies, programs, staff.

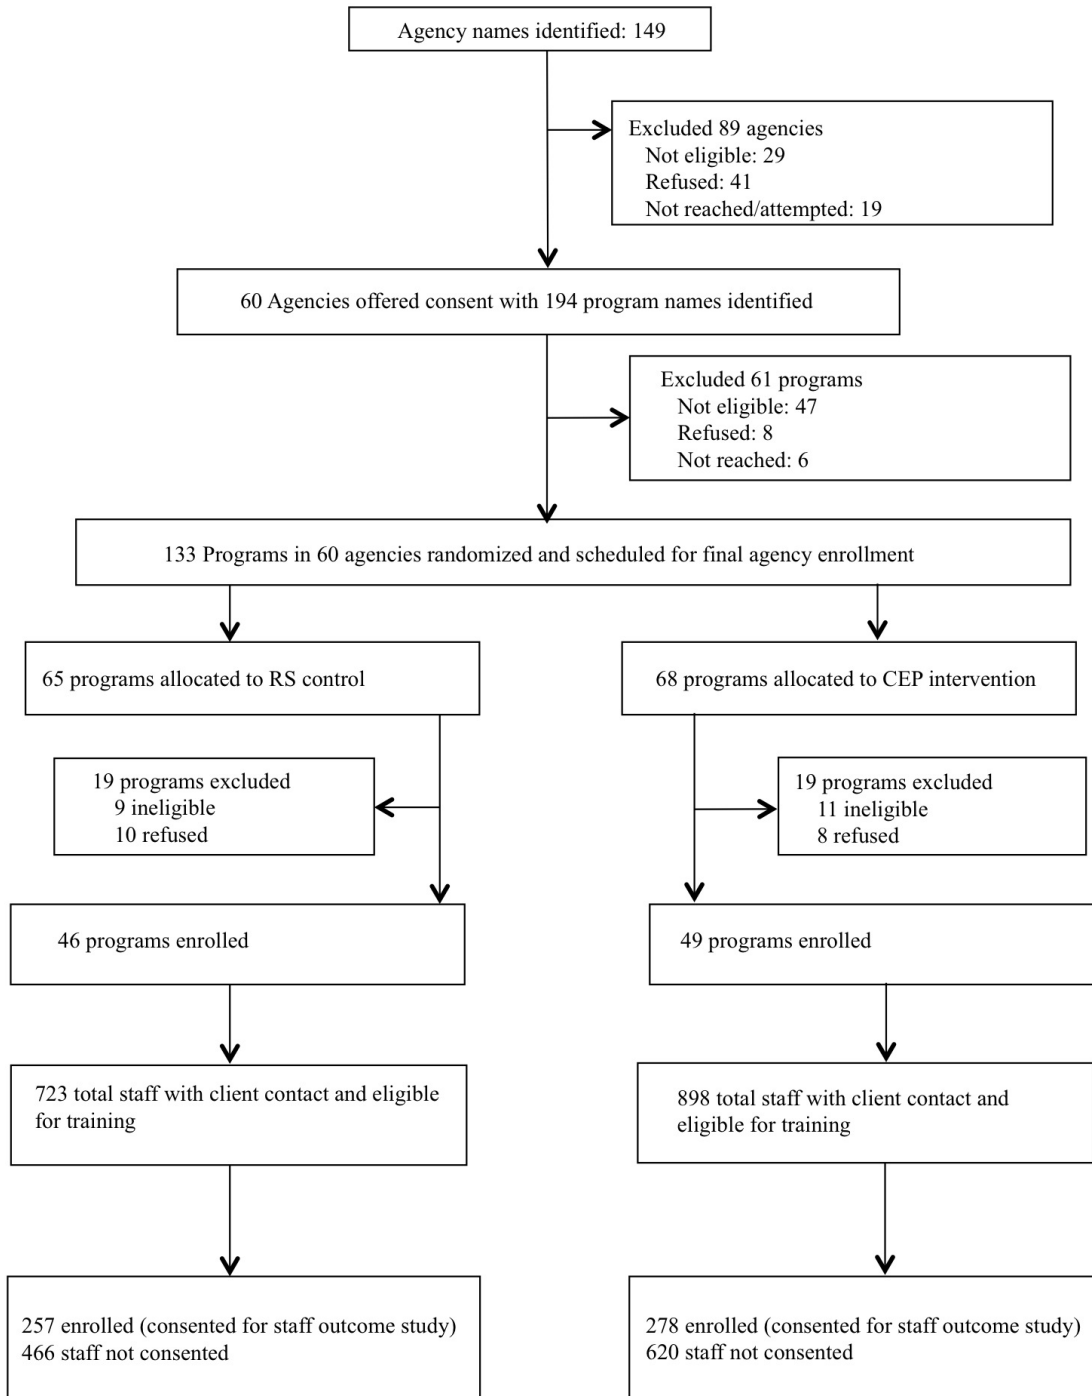

Figure 1: Trial profile

\*One administrator was not counted due to participation in both RS and CEP intervention arms.

**Appendix A – Items on Administrator Baseline Survey asking number of staff with direct client contact**

1. Approximately how many people—*both paid and volunteer*—work in your organization?
  - a. Number of Paid employees \_\_\_\_\_
  - b. Number of Volunteer workers \_\_\_\_\_
  
2. Approximately how many full-time equivalent (FTE) *paid staff* does your organization employ in each of the following categories? (If none, please write NONE or 0).

|                                                                                                                              |               |
|------------------------------------------------------------------------------------------------------------------------------|---------------|
| Psychiatrists                                                                                                                | _____ FTE     |
| Psychologists (licensed or waived)                                                                                           | _____ FTE     |
| Professional Social Workers (licensed or waived)                                                                             | _____ FTE     |
| Marriage and Family Therapists (licensed or waived)                                                                          | _____ FTE     |
| Other Mental Health Staff (e.g. occupational therapist,<br>psychiatric nurses or technicians, etc)<br>(please specify) _____ | _____ FTE     |
| <br>Substance Abuse Specialists (licensed or certified)                                                                      | <br>_____ FTE |
| <br>Physicians (excluding Psychiatrists)                                                                                     | <br>_____ FTE |
| Other licensed medical staff (e.g., RNs, NPs, Phys Assistants)<br>(please specify) _____                                     | _____ FTE     |

**Appendix B. Characteristics of programs, total staff, and enrolled staff by intervention condition\***

|                                                              | Overall |      | RS  |      | CEP |      |
|--------------------------------------------------------------|---------|------|-----|------|-----|------|
| <b>Programs</b>                                              |         |      |     |      |     |      |
| Number of programs, n                                        | 95      |      | 46  |      | 49  |      |
| South Los Angeles (vs. Metro), n, %                          | 52      | 54.7 | 24  | 52.2 | 28  | 57.1 |
| Service sector, n, %                                         |         |      |     |      |     |      |
| Healthcare sectors                                           |         |      |     |      |     |      |
| Primary care                                                 | 17      | 17.9 | 8   | 17.4 | 9   | 18.4 |
| Mental health services                                       | 18      | 18.9 | 10  | 21.7 | 8   | 16.3 |
| Substance abuse                                              | 20      | 21.1 | 11  | 23.9 | 9   | 18.4 |
| Social-community sectors                                     |         |      |     |      |     |      |
| Homeless services                                            | 10      | 10.5 | 5   | 10.9 | 5   | 10.2 |
| Community-based <sup>†</sup>                                 | 30      | 31.6 | 12  | 26.1 | 18  | 36.7 |
| # programs ≥1 staff participate in kick-off conference, n, % | 45.7    | 47.4 | 22  | 44.9 | 23  | 46.9 |
| <b>Eligible staff<sup>‡</sup></b>                            |         |      |     |      |     |      |
| Number of total staff with client contact, <sup>¶</sup> n    | 1621    |      | 723 |      | 898 |      |
| Attend kick off conference, n, %                             | 104     | 6.4  | 56  | 7.7  | 48  | 5.3  |
| South Los Angeles (vs. Metro), n,%                           | 809     | 49.9 | 320 | 44.3 | 489 | 54.5 |
| Service sector, n, %                                         |         |      |     |      |     |      |
| Healthcare sectors                                           |         |      |     |      |     |      |
| Primary care                                                 | 493     | 30.4 | 201 | 27.8 | 292 | 32.5 |
| Mental health services                                       | 290     | 17.9 | 110 | 15.2 | 180 | 20.0 |
| Substance abuse                                              | 264     | 16.3 | 132 | 18.3 | 132 | 14.7 |
| Social-community sectors                                     |         |      |     |      |     |      |
| Homeless services                                            | 168     | 10.4 | 94  | 13.0 | 74  | 8.2  |
| Community-based                                              | 406     | 25.0 | 186 | 25.7 | 220 | 24.5 |

\*Chi-square test was used for a comparison between the two study groups. Analysis of staff data was accounted for the design effect of the cluster randomization.  $p > 0.05$  for all comparisons between the two study groups. <sup>†</sup>Community-based programs: social services, child welfare, faith-based, food banks, parks and recreation, senior centers, barber shops, beauty salons, exercise clubs;

<sup>‡</sup>Total staff were any administrators or providers at enrolled study programs. Study providers are defined as any individuals – volunteers and employed, professional and non-professionals with direct client contact. Total staff numbers were estimated from administrator surveys. <sup>¶</sup>One provider was across intervention arms and excluded for the count.

## CPIC Training Participation Appendices

**Appendix C** Staff participation outcomes in training activities among the subset of 70 programs that had any participation by intervention status\*

| Variable                                               | RS       |              | CEP      |             | Group effect |           |          |
|--------------------------------------------------------|----------|--------------|----------|-------------|--------------|-----------|----------|
|                                                        | Estimate | 95% CI       | Estimate | 95% CI      | <i>t</i>     | <i>df</i> | <i>p</i> |
| <i>Primary outcome</i>                                 |          |              |          |             |              |           |          |
| Total hours in training, mean                          | .46      | 0.17-0.75    | 2.47     | 1.1-3.85    | 4.1          | 69        | <.001    |
| <i>Within type of programs</i>                         |          |              |          |             |              |           |          |
| Healthcare programs                                    | .58      | .20-.97      | 2.01     | .25-3.78    | 2.2          | 69        | .031     |
| Primary care                                           | .31      | -.01 to .62  | .71      | -.05-1.47   | 1.4          | 69        | .152     |
| Mental health services                                 | .53      | -.13 to 1.19 | 4.08     | -1.37-9.52  | 2.9          | 69        | .005     |
| Substance abuse                                        | .43      | -.17-1.03    | 4.03     | 1.52-6.53   | 2.6          | 69        | .011     |
| Social-community programs                              | .27      | .07-.48      | 3.24     | 1.93-4.55   | 5.9          | 69        | <.001    |
| Homeless services                                      | .17      | .00-.35      | 5.06     | -1.12-11.23 | 7.3          | 69        | <.001    |
| Community-based programs <sup>a</sup>                  | .26      | .08-.43      | 3.49     | 1.84-5.15   | 6.1          | 69        | <.001    |
| <i>Secondary outcomes-collaborative care component</i> |          |              |          |             |              |           |          |
| Any CBT Training, <sup>b</sup> %                       | 7.6      | 2.69-12.51   | 12.34    | 4.96-19.71  | 1.1          | 69        | .268     |
| Total hours in CBT training, mean                      | .19      | .04-.34      | 1.08     | .28-1.89    | 3.1          | 69        | .003     |
| Any CM training, <sup>c</sup> %                        | 4.57     | 1.41-7.74    | 19.36    | 9.66-29.07  | 3.5          | 69        | <.001    |
| Total hours in CM training, mean                       | .11      | .03-.2       | .8       | .41-1.18    | 4.7          | 69        | <.001    |
| Any med training, <sup>d</sup> %                       | 2.91     | -.23 to 6.04 | 8.45     | 3.86-13.04  | 2            | 69        | .053     |
| Total hours in MED training, mean                      | .02      | -.01 to .05  | .08      | .03-.13     | 2            | 69        | .053     |
| Any other types of training, <sup>e</sup> %            | 6.85     | 3.62-10.08   | 11.15    | 4.79-17.51  | 1.4          | 69        | .177     |
| Total hours in other types of training, mean           | .11      | .03-.18      | .6       | .23-.96     | 3.6          | 69        | <.001    |

\*Logistic regression models for binary variables or log-linear regression models for total hours adjusted for community and accounted for the design effect of the cluster randomization; full sample analyses were also controlled for sector.

<sup>a</sup>social services agencies, faith-based, senior centers, parks and recreation, barber shops.

<sup>b</sup>cognitive behavioral therapy.

<sup>c</sup>care management.

<sup>d</sup>antidepressant medication management and education.

<sup>e</sup>administrator training in team building, grant writing for programs, active listening, “resiliency-class”.
